# Supplementary material for: Efficient Suppression of Abdominal Aortic Aneurysm Expansion in Rats through Systemic Administration of Statin-Loaded Nanomedicine
Source: PubMed Central journal article supplement (PMC7699030; doi:10.3390/ijms21228702), 2020-11-18
Supplement: ijms-21-08702-s001.pdf [file ijms-21-08702-s001.pdf]

## Supplementary Materials

# Efficient Suppression of Abdominal Aortic Aneurysm Expansion in Rats by Systemic Administration of Statin-Loaded Nanomedicine

Natsumi Fukuhara <sup>1</sup>, Yuto Honda <sup>2,3</sup>, Nao Ukita <sup>3</sup>, Makoto Matsui <sup>2</sup>, Yutaka Miura <sup>2,3,\*</sup> and Katsuyuki Hoshina <sup>1,\*</sup>

<sup>1</sup> Division of Vascular Surgery, Department of Surgery, Graduate School of Medicine, The University of Tokyo, 7-3-1 Hongo, Bunkyo-ku, Tokyo 113-8655, Japan ; [FUKUHARAN-SUR@h.u-tokyo.ac.jp](mailto:FUKUHARAN-SUR@h.u-tokyo.ac.jp) (N.F.), [traruba@gmail.com](mailto:traruba@gmail.com) (K.H.)

<sup>2</sup> Laboratory for Chemistry and Life Science, Institute of Innovative Research, Tokyo Institute of Technology, 4259 Nagatsuta-cho, Midori-ku, Yokohama, Kanagawa, 226-8503, Japan ; [honda.y.aj@m.titech.ac.jp](mailto:honda.y.aj@m.titech.ac.jp) (Y.H.), [matsui.m.ad@m.titech.ac.jp](mailto:matsui.m.ad@m.titech.ac.jp) (M.M), [miura.y.ai@m.titech.ac.jp](mailto:miura.y.ai@m.titech.ac.jp) (Y.M.)

<sup>3</sup> Department of Life Science and Technology, School of Life Science and Technology, Tokyo Institute of Technology, 4259 Nagatsuta-cho, Midori-ku, Yokohama, Kanagawa 226-8503, Japan; [ukita.n.aa@m.titech.ac.jp](mailto:ukita.n.aa@m.titech.ac.jp) (N.U.)

\* Correspondence: [miura.y.ai@m.titech.ac.jp](mailto:miura.y.ai@m.titech.ac.jp) (Y.M.), [traruba@gmail.com](mailto:traruba@gmail.com) (K.H) ; Tel.: +81-45-924-5225 (Y.M.), +81-35-800-8653 (K.H)

## Supplementary Figures

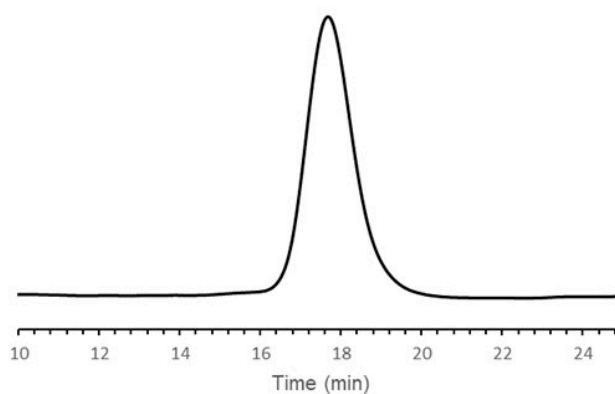

**Figure S1.** GPC chart of PEG-P[Lys]<sub>45</sub>. Column: Superdex<sup>TM</sup> 200 Increase 10/300 GL, eluent: 10mM phosphate buffer (pH7.4) containing 500 mM NaCl, flow rate: 0.5 mL/min, temperature: room temperature, detection: absorbance at 220 nm.

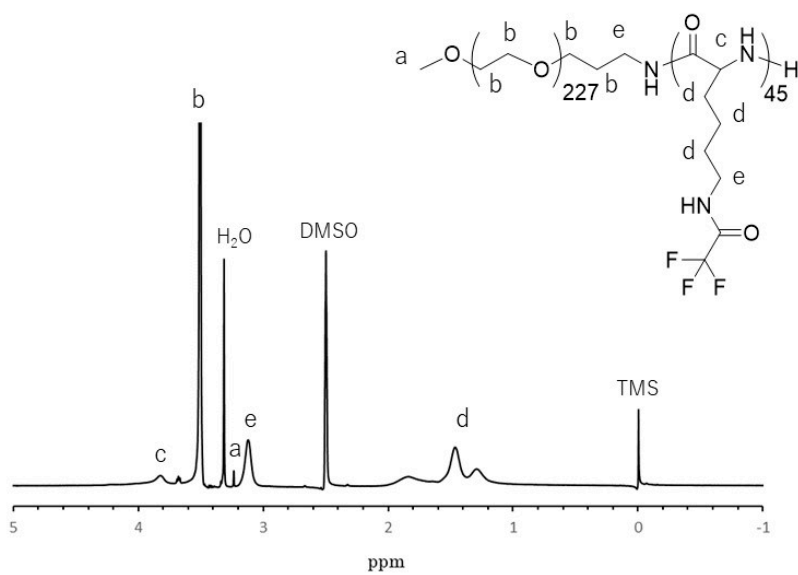

**Figure S2.**  $^1\text{H-NMR}$  spectrum of PEG-P[Lys(TFA)]<sub>45</sub> (solvent: DMSO).

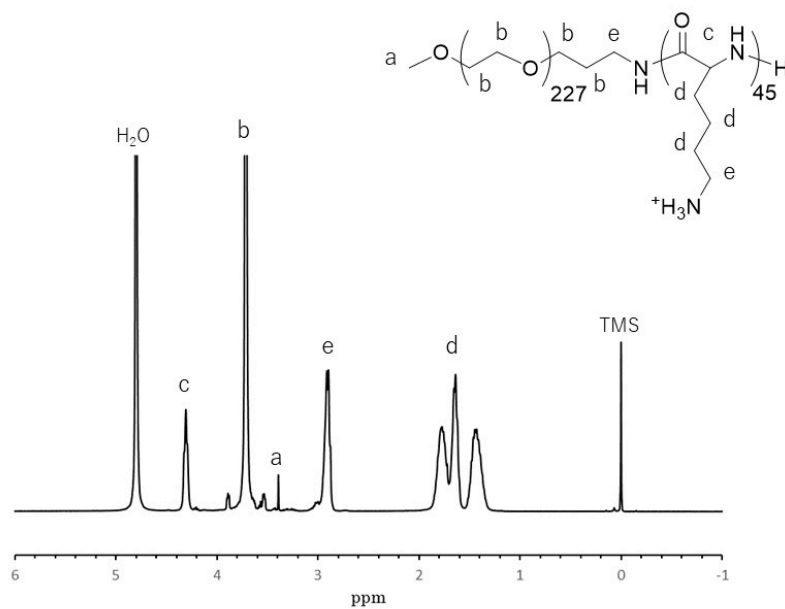

**Figure S3.**  $^1\text{H-NMR}$  spectrum of PEG-P[Lys(TFA)]<sub>45</sub> (solvent: DMSO).

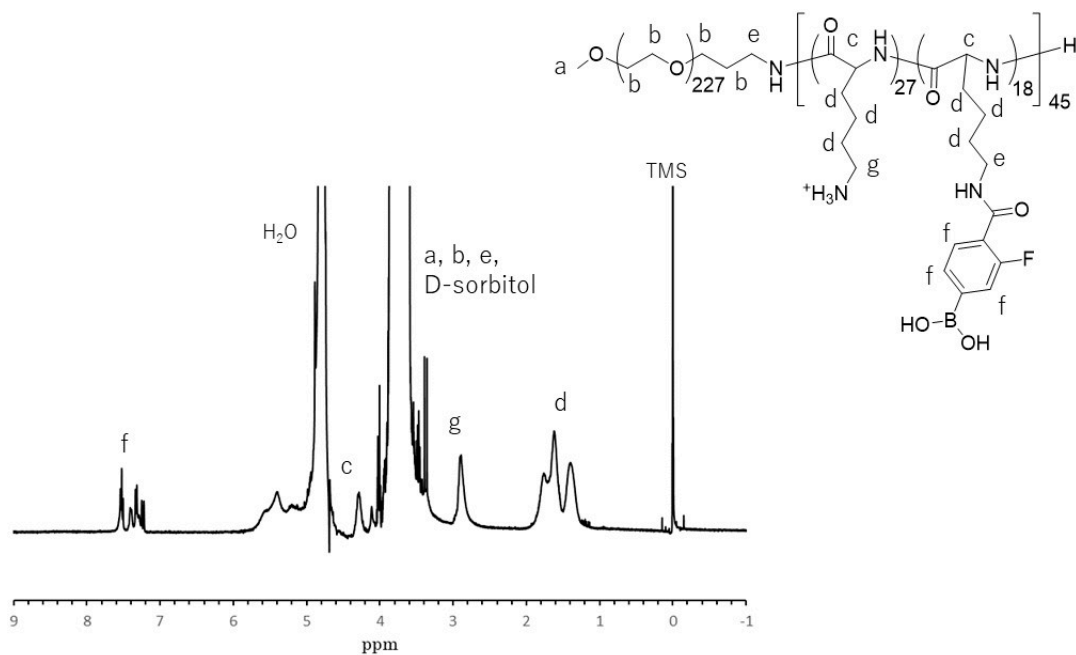

**Figure S4.** <sup>1</sup>H-NMR spectrum of PEG-P[Lys(FPBA)]<sub>45</sub> (solvent: D<sub>2</sub>O with 90 mg/mL of D-sorbitol).

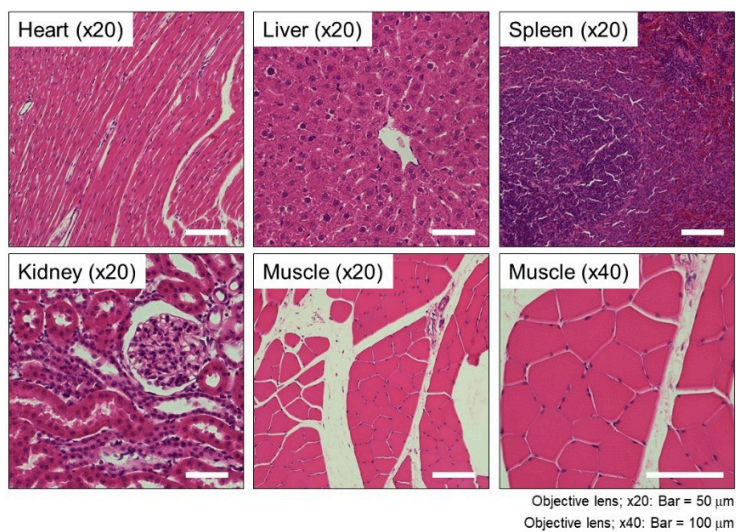

**Figure S5.** Photomicrographs of organs after PS/m treatment. Hematoxylin and eosin-stained heart, liver, spleen, kidney, and muscles. Scale bars represent 50 μm in x20 images and 100 μm in x40 image.
